# Supplementary material for: Deficiency of parkin and PINK1 impairs age-dependent mitophagy in Drosophila
Source: eLife. 2018 May 29;7:e35878. doi: 10.7554/eLife.35878 (PMC6008047; doi:10.7554/eLife.35878)
Supplement: Figure 1—source data 1. [file elife-35878-fig1-data1.xlsx]

## Sheet: Sheet1
W1118
age (weeks)	1	3	4
fly1	0.000985599	0.0109093	0.0138654
fly2	0.00219122	0.0154923	0.0146913
fly3	0.00588616	0.0105951	0.0199544
fly4	0.00237623	0.00932688	0.0302028
fly5	0.00302791	0.011634	0.0226371
fly6			0.0345215
UAS-Atg1k38a
age (weeks)	1	3	4
fly1	0.00160224	0.0155733	0.00225346
fly2	0.0124419	0.00799169	0.00549676
fly3	0.00430406	0.00474132	0.00593692
fly4	0.000624586	0.000745899	0.00375582
fly5		0.0012902
