# Supplementary material for: Deficiency of parkin and PINK1 impairs age-dependent mitophagy in Drosophila
Source: eLife. 2018 May 29;7:e35878. doi: 10.7554/eLife.35878 (PMC6008047; doi:10.7554/eLife.35878)
Supplement: Figure 3—source data 1. [file elife-35878-fig3-data1.xlsx]

## Sheet: Sheet1
ctrl RNAi
age (weeks)	1	3	4
fly1	0.00356	0.00683	0.016
fly2	0.00428	0.0168	0.0264
fly3	0.0053	0.0105	0.0185
fly4		0.0191
W1118
age (weeks)	1	3	4
fly1	0.0009856	0.0109	0.0139
fly2	0.0021912	0.0155	0.0147
fly3	0.0058862	0.0106	0.02
fly4	0.0030279	0.0116	0.0226
fly5			0.0345
parkin1 RNAi
age (weeks)	1	3	4
fly1	0.0056781	0.0027145	0.0012548
fly2	0.0024386	0.0022624	0.00064273
fly3	0.0025733	0.0061194	0.0012525
PINK1B9
age (weeks)	1	3	4
fly1	0.0012529	0.0030008	0.003902
fly2	0.0034312	0.002602	0.004761
fly3	0.0058694	0.0046647	0.005383
