# Supplementary material for: Deficiency of parkin and PINK1 impairs age-dependent mitophagy in Drosophila
Source: eLife. 2018 May 29;7:e35878. doi: 10.7554/eLife.35878 (PMC6008047; doi:10.7554/eLife.35878)
Supplement: Figure 3—source data 2. [file elife-35878-fig3-data2.xlsx]

## Sheet: Sheet1
genotype	ctrl RNAi	dUSP15 RNAi	dUSP30 RNAi	parkin1 + ctrl RNAi	parkin1 + dUSP15 RNAi	parkin1 + dUSP30 RNAi	parkin2 + ctrl RNAi	parkin2 + dUSP15 RNAi	parkin2 + dUSP30 RNAi	PINK1B9 + ctrl RNAi	PINK1B9 + dUSP15 RNAi	PINK1B9 + dUSP30 RNAi
fly1	0.016	0.0223	0.0255	0.0046301	0.0242	0.013	0.0042034	0.0207	0.0131	0.0082724	0.0185	0.0033105
fly2	0.0264	0.0168	0.0162	0.0072968	0.0217	0.0153	0.0041965	0.015	0.0125	0.0027712	0.0139	0.0051232
fly3	0.0185	0.0157	0.0153	0.0035179	0.0218	0.0111	0.0061151	0.016	0.0129	0.0094152	0.0141	0.0043123
fly4				0.0020327	0.022	0.0133	0.0033132	0.0301	0.0142	0.0045537	0.0136	0.002402
