# Supplementary material for: Deficiency of parkin and PINK1 impairs age-dependent mitophagy in Drosophila
Source: eLife. 2018 May 29;7:e35878. doi: 10.7554/eLife.35878 (PMC6008047; doi:10.7554/eLife.35878)
Supplement: Figure 4—source data 1. [file elife-35878-fig4-data1.xlsx]

## Sheet: Sheet1
genotype	ctrl RNAi		parkin1 RNAi
age (weeks)	1	4	1	4
fly1	0.0865	0.1339	0.1216	0.0402
fly2	0.102	0.1703	0.0725	0.0704
fly3	0.0658	0.1278	0.1106	0.0331
fly4	0.0784	0.1545	0.0913	0.0807
