# Supplementary material for: Deficiency of parkin and PINK1 impairs age-dependent mitophagy in Drosophila
Source: eLife. 2018 May 29;7:e35878. doi: 10.7554/eLife.35878 (PMC6008047; doi:10.7554/eLife.35878)
Supplement: Figure 4—source data 2. [file elife-35878-fig4-data2.xlsx]

## Sheet: Sheet1
genotype	ctrl RNAi	dUSP15 RNAi	parkin1 + ctrl RNAi	parkin1 + dUSP15 RNAi
fly1	0.1419	0.132	0.0728	0.1118
fly2	0.1329	0.152	0.0738	0.1442
fly3	0.1329	0.116	0.0758	0.0932
fly4	0.1906	0.1564	0.0719	0.1113
